# Supplementary material for: ZnO Particles Stabilized in Polymeric Matrix for Liquid-Phase Methanol Synthesis
Source: MDPI journal article supplement (doi:10.3390/catal13010116), 2023-01-04
Supplement: s1 [file s1]

## Supporting Information

### ZnO Particles Stabilized in Polymeric Matrix for Liquid-Phase Methanol Synthesis

Valentin Yu. Doluda <sup>1</sup>, Olga P. Tkachenko <sup>2</sup>, Antonina A. Stepacheva <sup>1</sup>, Alexander I. Sidorov <sup>1</sup>, Alexey V. Bykov <sup>1</sup>, Mikhail G. Sulman <sup>1,\*</sup> and Yury Yu. Kosivtsov <sup>1</sup>

<sup>1</sup> Department of biotechnology, chemistry and standardization, Tver State Technical University, Tver 170026, Russia

<sup>2</sup> Laboratory of developments and study of polyfunctional catalysts, N.D. Zelinsky Institute of Organic Chemistry of Russian Academy of Science, Moscow 119991, Russia,

\* Correspondence: sulmanmikhail@yandex.ru; Tel.: +7(4822)789348

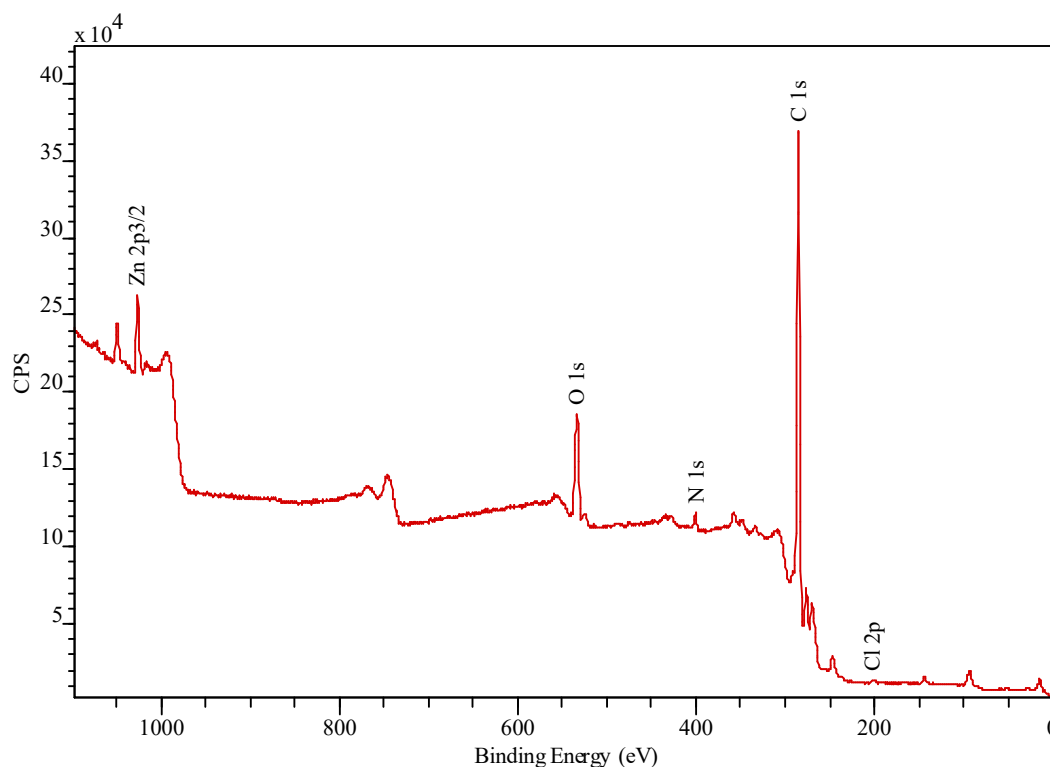

**Figure S1.** The survey XPS spectra for the initial Zn-HPS.

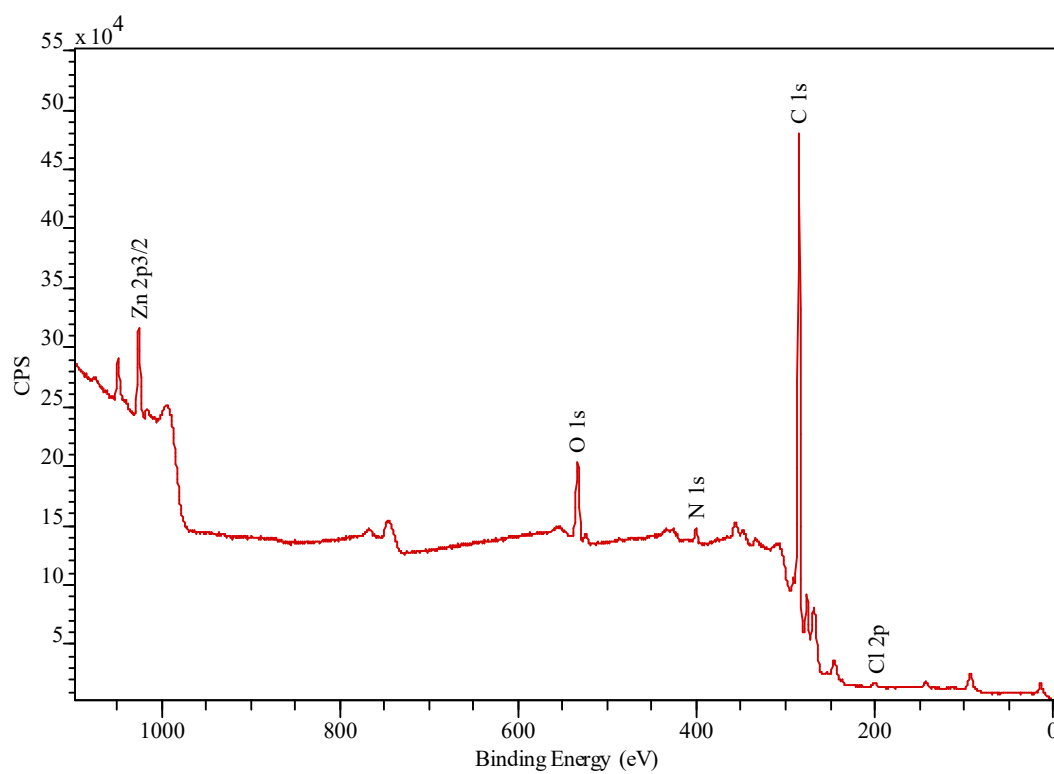

**Figure S2.** The survey XPS spectra for the Zn-HPS treated with hydrogen.

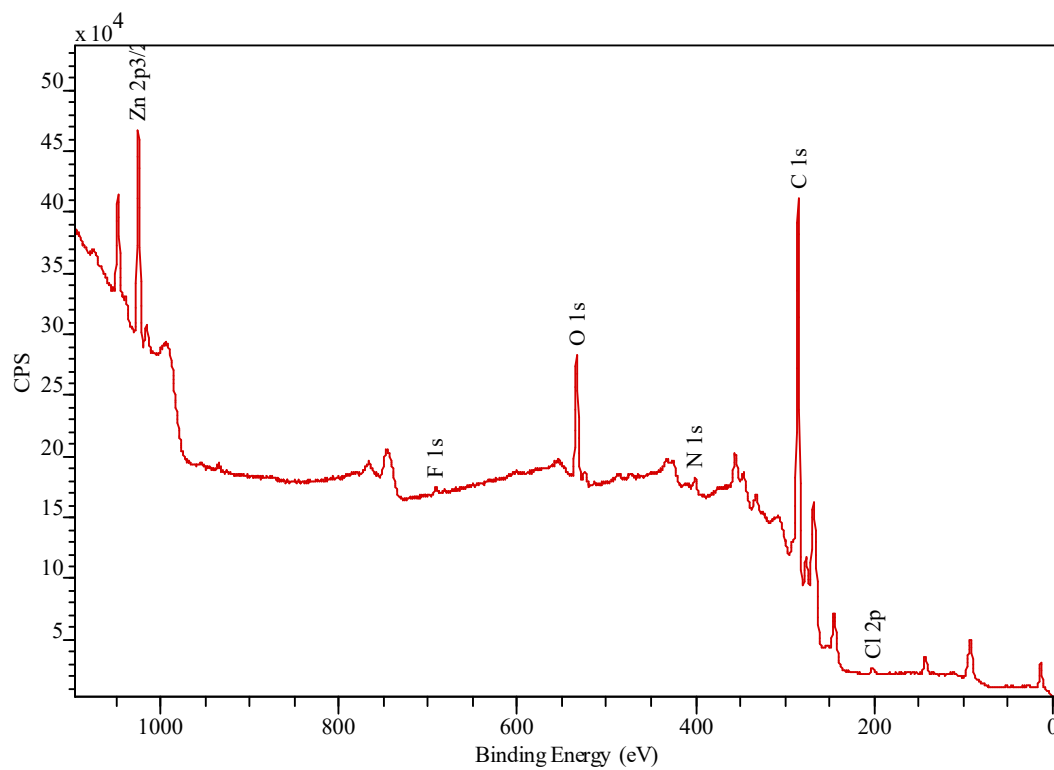

**Figure S3.** The survey XPS spectra for the Zn-HPS after catalysis.

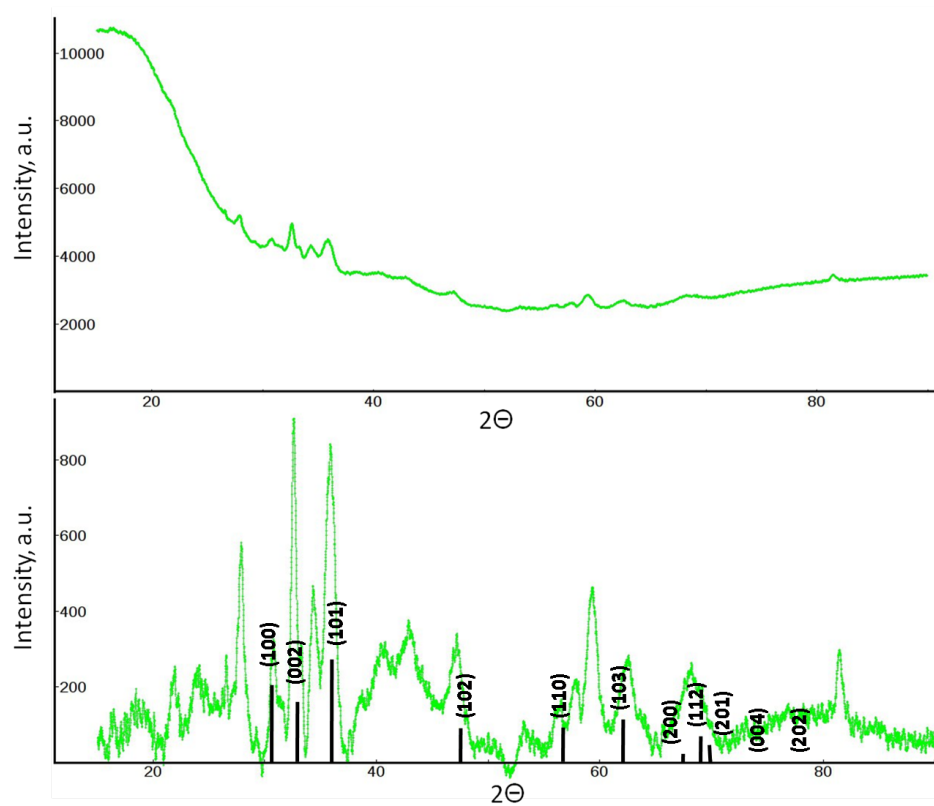

**Figure S4.** XRD pattern for the Zn-HPS.

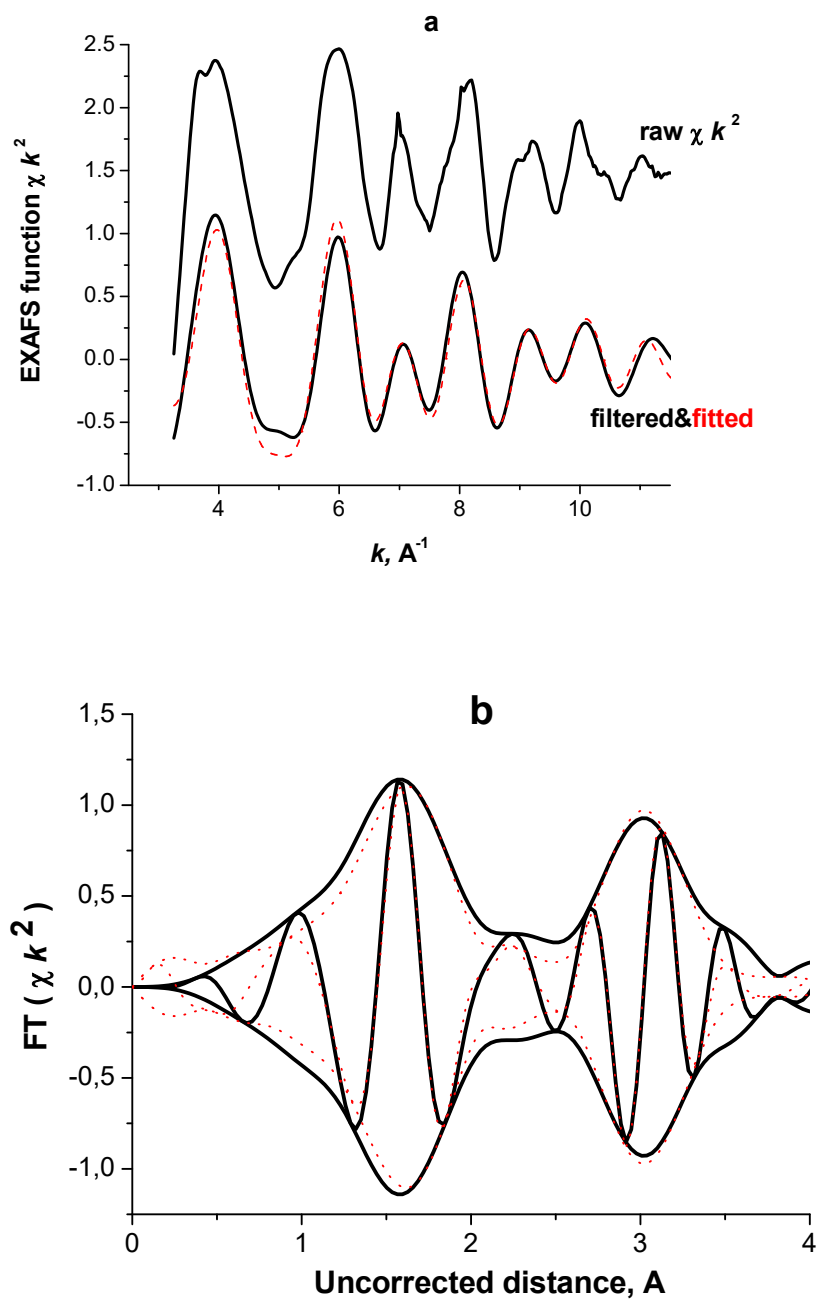

**Figure S5.** Model fits of Zn K EXAFS of ZnO-HPS initial samples in k-space (a) and r-space (b).

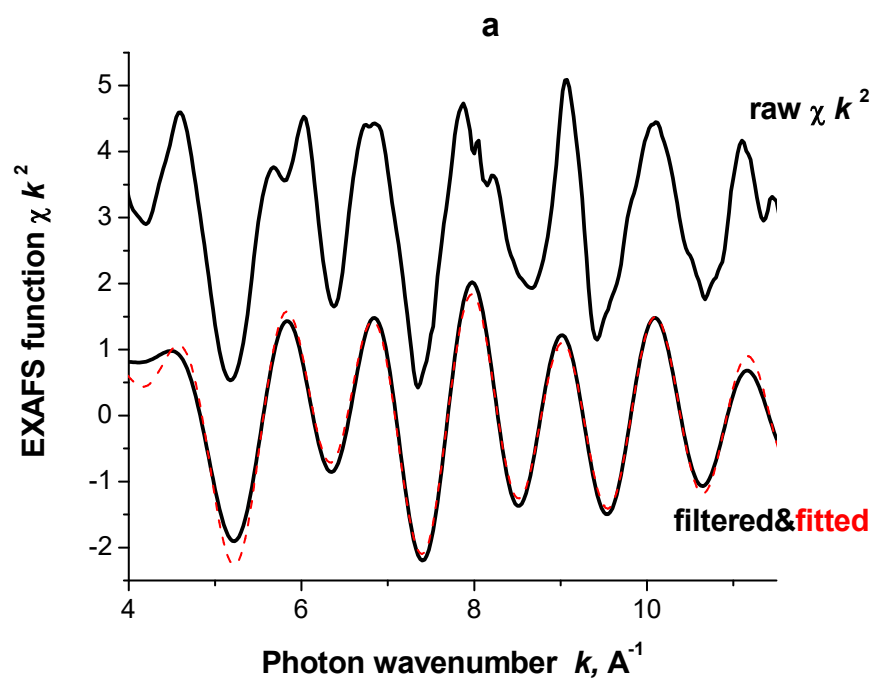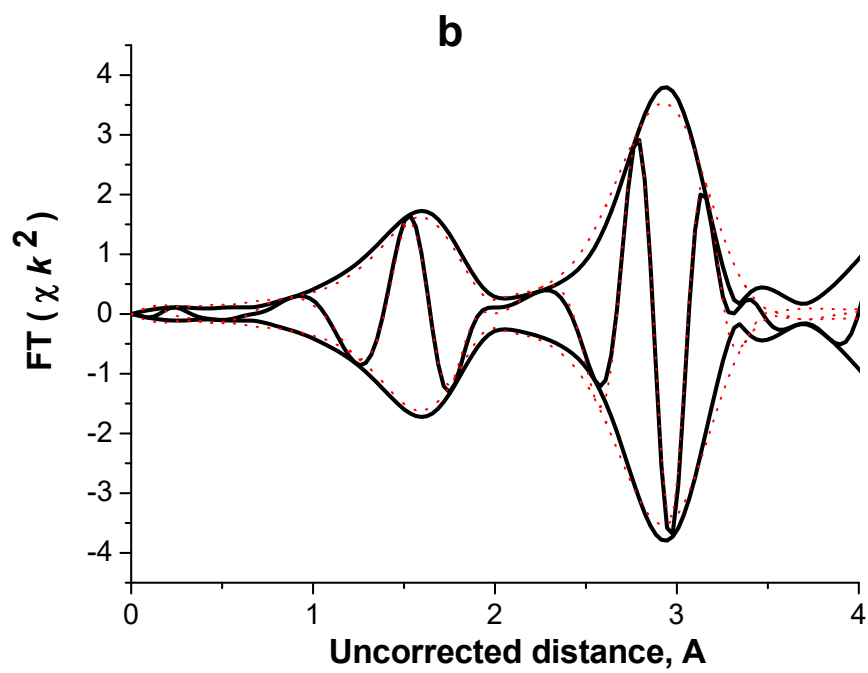

**Figure S6.** Model fits of Zn K EXAFS of ZnO-HPS treated samples in k-space (a) and r-space (b).

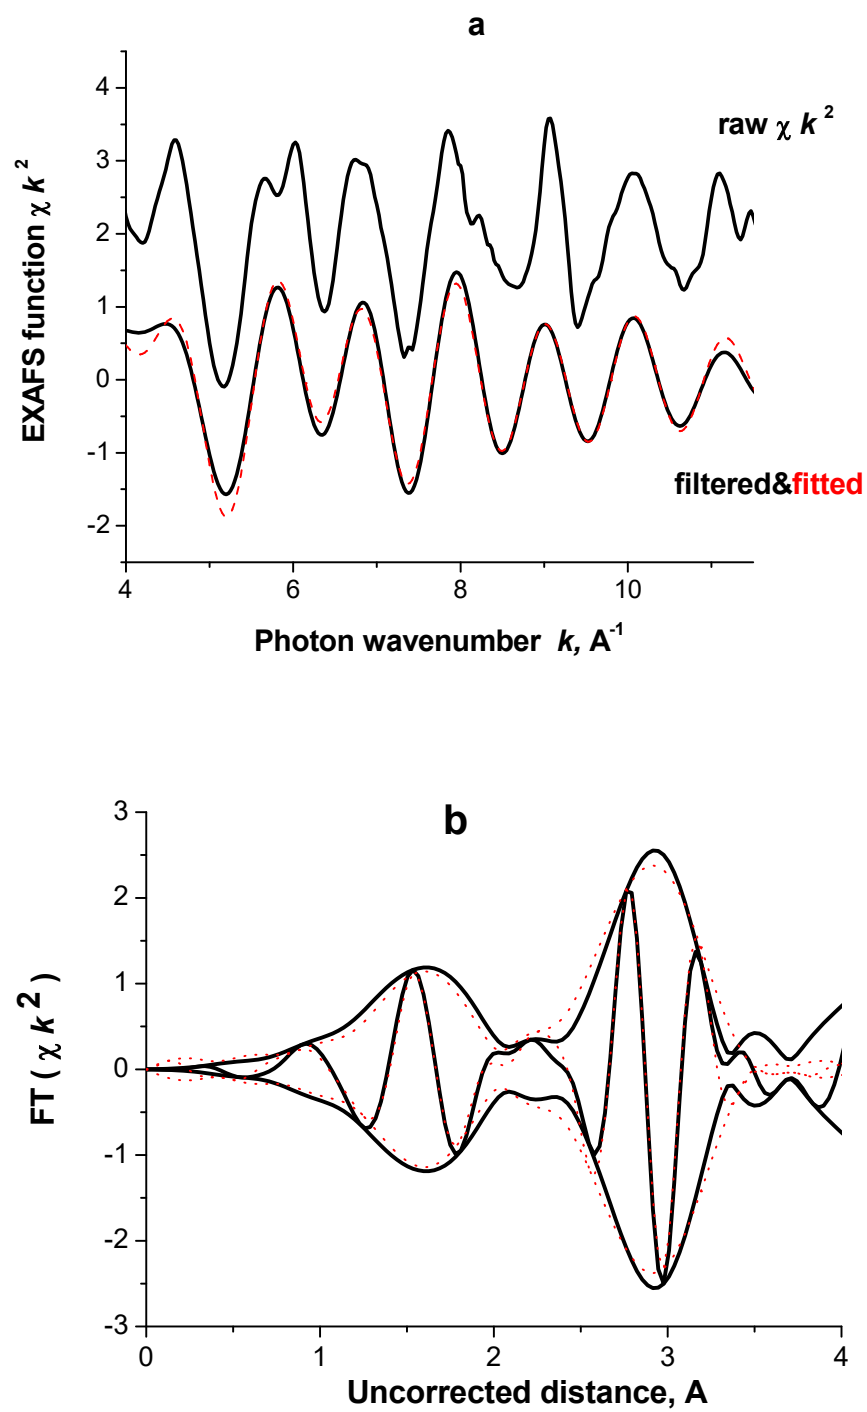

**Figure S7.** Model fits of Zn K EXAFS spectrum of ZnO-HPS after catalysis sample in k-space (a) and r-space (b).
